# Supplementary material for: Diurnal variations of gaseous and particulate nitrophenol isomers in the atmosphere monitored by using wet scrubbing online preconcentration
Source: Royal Society of Chemistry journal article supplement (doi:10.1039/d2ea00021k), 2022-01-01
Supplement: d2ea00021k1.pdf [file d2ea00021k1.pdf]

## Electronic Supplementary Information

Environmental Science: Atmospheres

Royal Society of Chemistry

2022

### Wet scrubbing online preconcentration for monitoring of diurnal variations of nitrophenol isomers in the atmosphere

Kunio Sakakibara <sup>a</sup>, Misaki Taira <sup>a</sup>, Kanako Nagatomi <sup>a</sup>, Genki Kuriyama <sup>a</sup>, Shin-Ichi Ohira <sup>a</sup>, Kei Toda <sup>a\*</sup>

<sup>1</sup> Department of Chemistry, Kumamoto University, 2-39-1 Kurokami, Kumamoto 860–8555, Japan

Corresponding author: [todakei@kumamoto-u.ac.jp](mailto:todakei@kumamoto-u.ac.jp)

#### Contents

**Table S1.** Instrumental parameters used for APCI-MS/MS for NPs and phenol

**Figure S1.** Calibration curves for NPs and phenol. Internal standard concentrations were 2NP ring-*d*4 45 µg/L, 4NP ring-*d*4 45 µg/L and phenol ring-*d*5 90 µg/L.

**Table S2.** Ranges and linearities of calibration curves and limits of detection for liquid sample and converted air concentration.

**Table S1.** Instrumental parameters used for APCI-MS/MS for NPs and phenol

| Compound               | MW*    | Precursor ion ( <i>m/z</i> ) | Product ion ( <i>m/z</i> ) | Q1 pre bias (V) | CE* (eV) | Q3 pre bias (V) |
|------------------------|--------|------------------------------|----------------------------|-----------------|----------|-----------------|
| 2NP                    | 139.11 | 138.1                        | 108.1                      | 25.0            | 17.0     | 20.0            |
| 2NoC                   | 153.14 | 152.0                        | 122.1                      | 16.0            | 18.0     | 24.0            |
| 2NmC                   | 153.14 | 152.0                        | 122.1                      | 16.0            | 18.0     | 24.0            |
| 2NpC                   | 153.14 | 152.0                        | 122.1                      | 16.0            | 18.0     | 24.0            |
| 4NP                    | 139.11 | 138.1                        | 108.1                      | 25.0            | 17.0     | 20.0            |
| 4NoC                   | 153.14 | 152.0                        | 122.1                      | 16.0            | 18.0     | 24.0            |
| 4NmC                   | 153.14 | 152.0                        | 122.1                      | 16.0            | 18.0     | 24.0            |
| 2,4DNP                 | 184.11 | 183.0                        | 109.0                      | 12.0            | 24.0     | 19.0            |
| 2,4DNPt                | 212.16 | 183.0                        | 109.0                      | 12.0            | 24.0     | 19.0            |
| 2,6DNpC                | 198.13 | 197.0                        | 167.0                      | 10.0            | 17.0     | 14.0            |
| 3NP                    | 139.11 | 138.1                        | 108.1                      | 25.0            | 17.0     | 20.0            |
| Phenol                 | 94.11  | 93.2                         | 65.0                       | 15.0            | 23.0     | 11.0            |
| ISTD                   |        |                              |                            |                 |          |                 |
| 2NP ring- <i>d4</i>    | 143.13 | 142.1                        | 112.0                      | 27.0            | 18.0     | 21.0            |
| 4NP ring- <i>d4</i>    | 143.13 | 142.1                        | 112.0                      | 27.0            | 18.0     | 21.0            |
| Phenol ring- <i>d5</i> | 99.14  | 98.1                         | 70.0                       | 18.0            | 23.0     | 27.0            |

\* MW: molecular weight; CE: collision energy

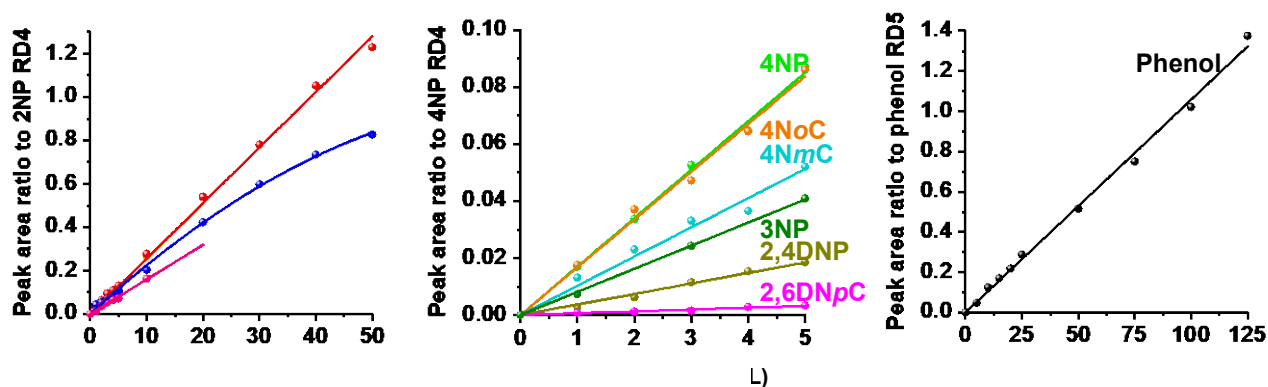

**Figure S1.** Calibration curves for (a) 2NPs and 2,4DNPt, (b) 4NPs, 3NP and DNPs and (c) phenol. Internal standard concentrations were 2NP ring-*d*4 45  $\mu\text{g/L}$ , 4NP ring-*d*4 45  $\mu\text{g/L}$  and phenol ring-*d*5 90  $\mu\text{g/L}$ .

**Table S2.** Ranges and linearities of calibration curves and limits of detection for liquid sample and converted air concentration.

| Compound | Calibration curve         |        | Limit of detection          |                         |                              |
|----------|---------------------------|--------|-----------------------------|-------------------------|------------------------------|
|          | Range ( $\mu\text{g/L}$ ) | $R^2$  | Extract ( $\mu\text{g/L}$ ) | Air ( $\text{ng/m}^3$ ) | Particle ( $\text{ng/m}^3$ ) |
| 2NP      | 1-50                      | 0.9986 | 0.24                        | 0.66                    | 0.33                         |
| 2NoC     | 1-10                      | 0.9972 | 0.17                        | 0.48                    | 0.24                         |
| 2NmC*    | -                         | -      | 0.24                        | 0.66                    | 0.33                         |
| 2NpC     | 1-50                      | 0.9993 | 0.21                        | 0.59                    | 0.25                         |
| 4NP      | 1-5                       | 0.9989 | 0.078                       | 0.22                    | 0.11                         |
| 4NoC     | 1-5                       | 0.9978 | 0.043                       | 0.12                    | 0.06                         |
| 4NmC     | 1-5                       | 0.9931 | 0.089                       | 0.25                    | 0.12                         |
| 2,4DNP   | 1-5                       | 0.9966 | 0.13                        | 0.35                    | 0.17                         |
| 2,4DNPt  | 1-10                      | 0.9962 | 0.11                        | 0.30                    | 0.15                         |
| 2,6DNpC  | 1-5                       | 0.9885 | 0.22                        | 0.62                    | 0.31                         |
| 3NP      | 1-5                       | 0.9997 | 0.13                        | 0.37                    | 0.18                         |
| Phenol   | 5-125                     | 0.9981 | 1.3                         | 3.7                     | 1.8                          |

\* 2NmC peak overlapped with 2NpC

Limit of detections were obtained from three times signal-to-noise ratios of chromatograms.
